# Supplementary figures and images for: SPAG7 deletion causes intrauterine growth restriction, resulting in adulthood obesity and metabolic dysfunction
Source: eLife journal article supplement (doi:10.7554/elife.91114), 2023-10-11

Figure 4B

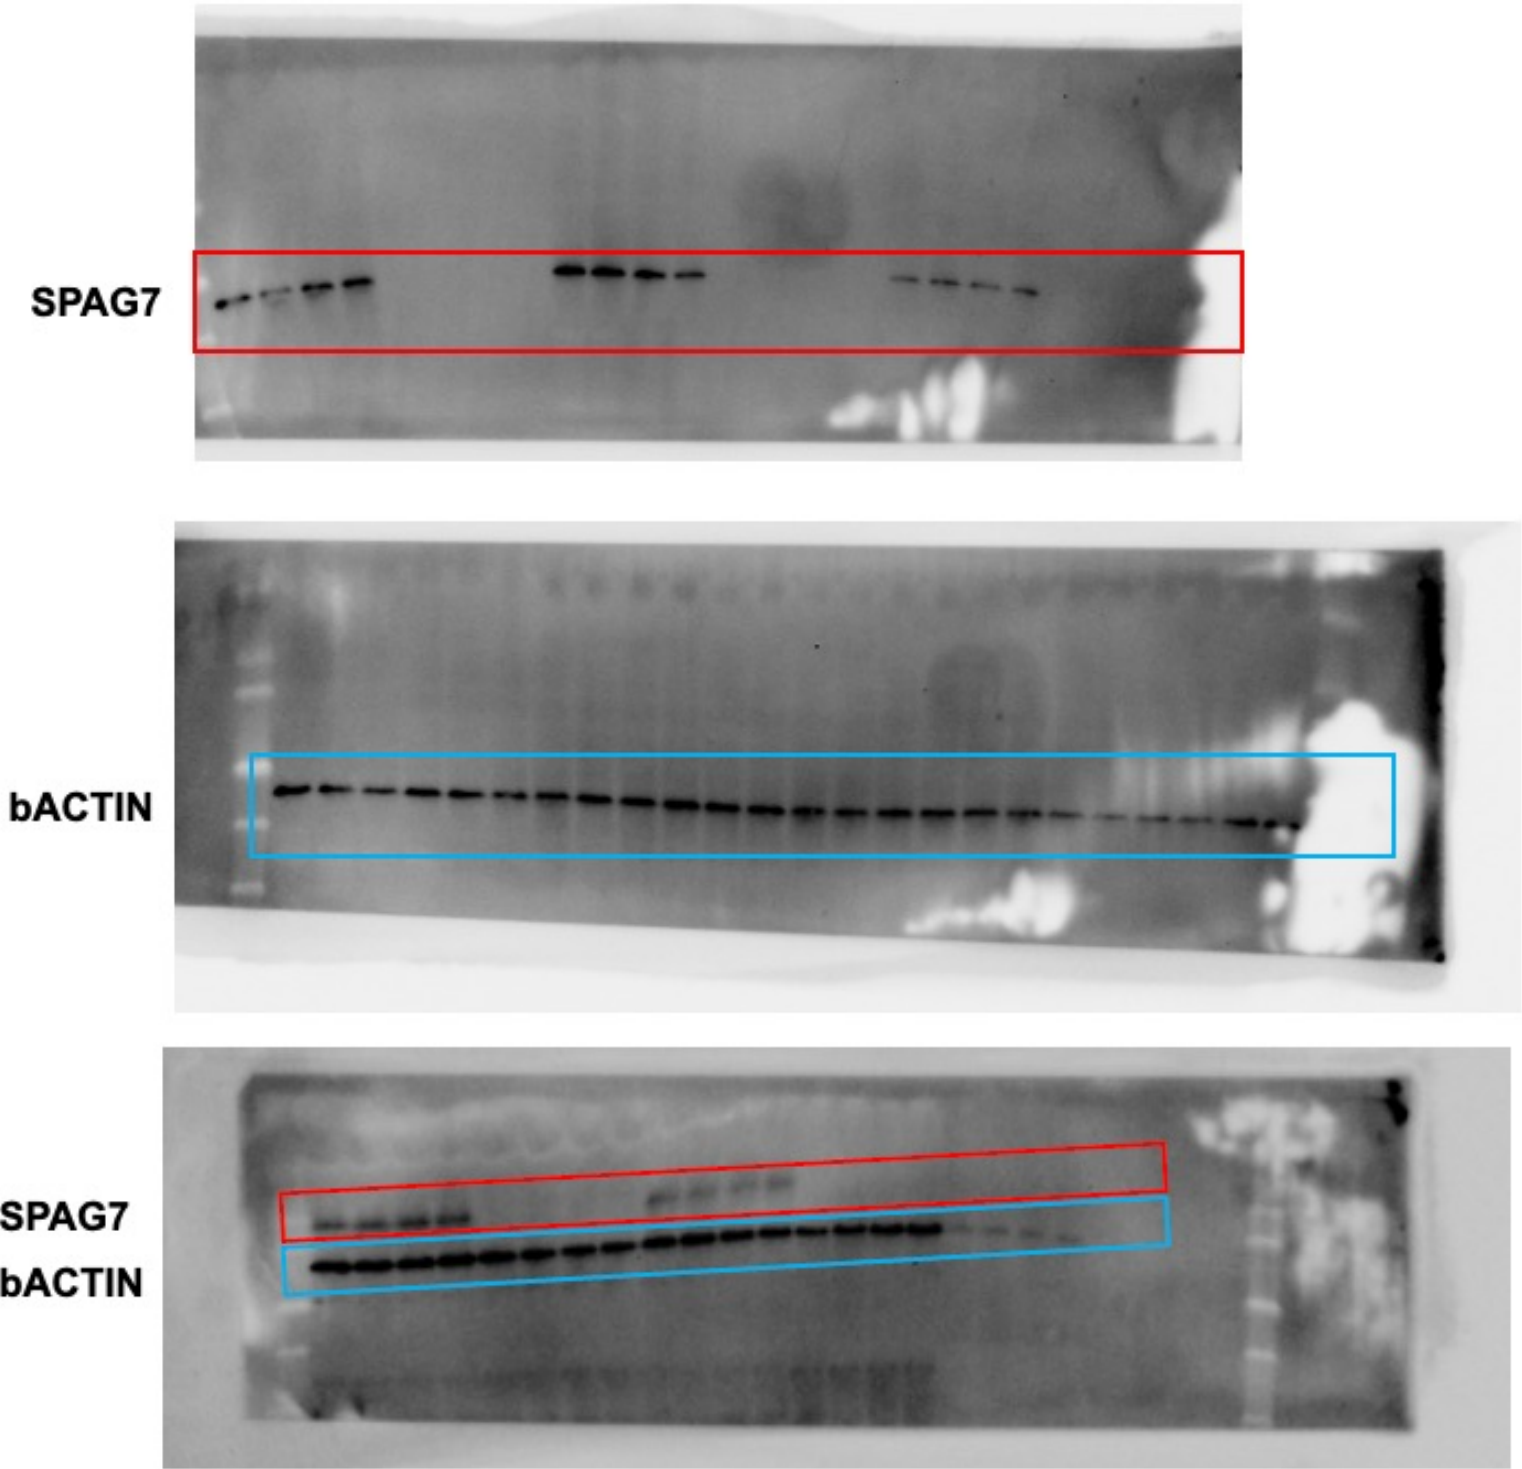

Supplement: fig4-data1 [file Source Data_Figure 4.pdf › Figure 4-source data 1/Source Data_Figure 4.pdf]

Figure 5M

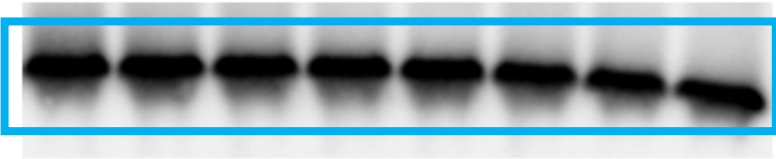

bACTIN

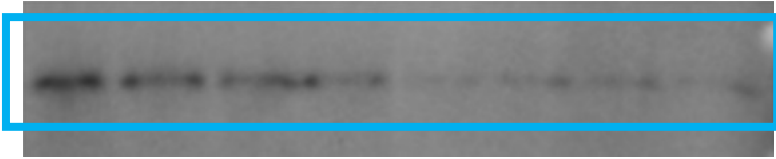

IGF1

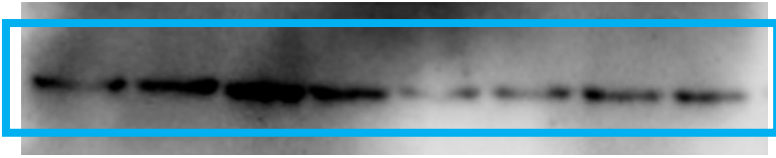

IGF2

Supplement: fig5-data1 [file Source data_Figure 5.pdf › Figure 5-source data 1/Source data_Figure 5.pdf]
